# Supplementary material for: One-Year Outcomes of Percutaneous Coronary Intervention in Patients with End-Stage Liver Disease
Source: PubMed Central journal article supplement — Clin Med Insights Cardiol. 2020 Jan 22;14:1179546820901491. doi: 10.1177/1179546820901491 (PMC6977100; doi:10.1177/1179546820901491), 2020-01-22
Supplement: cic_901491.pdf [file cic_901491.pdf]

PCI in Cirrhosis

| Child-Pugh Class            | Post-procedural AKI* | Post-procedural Stroke | Bleeding Events (BARC 2+) | Severe Bleeding Events (BARC 3B+) | Site Complications | Composite Adverse Events of Stroke, AKI, Severe Bleed |
|-----------------------------|----------------------|------------------------|---------------------------|-----------------------------------|--------------------|-------------------------------------------------------|
| ACS                         | 13/43 (30%)          | 0/46 (0%)              | 19/44 (43%)               | 7/44 (16%)                        | 3/46 (7%)          | 17/44 (39%) <sup>^</sup>                              |
| PCI                         | 11/29 (38%)          | 0                      | 13/30 (43%)               | 6/30 (20%)                        | 3/32 (9%)          | 14/30 (47%)                                           |
| Significant CAD without PCI | 2/14 (14%)           | 0                      | 6/14 (43%)                | 1/14 (7%)                         | 0/14 (0%)          | 3/14 (21%)                                            |
|                             | p = 0.164            |                        | p = 1.000                 | P = 0.402                         | p = 0.543          | p = 0.184                                             |
| Elective                    | 1/39 (3%)            | 0/41 (0%)              | 17/39 (44%)               | 8/39 (21%)                        | 2/41 (5%)          | 8/39 (21%) <sup>^</sup>                               |
| PCI                         | 1/18 (6%)            | 0                      | 9/18 (50%)                | 5/18 (28%)                        | 2/19 (11%)         | 5/18 (28%)                                            |
| Significant CAD without PCI | 0/21 (0%)            | 0                      | 8/21 (38%)                | 3/21 (14%)                        | 0/22 (0%)          | 3/21 (14%)                                            |
|                             | p = 0.462            |                        | p = 0.528                 | p = 0.432                         | p = 0.209          | p = 0.432                                             |

**Supplemental Table I: Adverse Events Stratified by Procedural Indication.** AKI = Acute Kidney Injury,

BARC = Bleeding Academic Research Consortium, PCI = Percutaneous Coronary Intervention, CAD = Coronary Artery Disease

\* Patients who already had end-stage renal disease on dialysis were excluded from analysis of AKI

<sup>^</sup> p = 0.095 for comparison of Composite outcome between ACS and Elective Intervention

| SYNTAX Scores               | Child-Pugh Class A | Child-Pugh Class B/C | p-value |
|-----------------------------|--------------------|----------------------|---------|
| PCI                         | 12.69 ± 2.22       | 20.78 ± 2.21         | 0.025   |
| Significant CAD Without PCI | 22.31 ± 4.86       | 22.29 ± 2.94         | 0.997   |
| <b>Total</b>                | 17.00 ± 2.61       | 21.38 ± 1.76         | 0.156   |

**Supplemental Table II: Mean SYNTAX Scores Compared to Severity of Liver Disease by Child-Pugh Class.**

Data is presented as mean ± standard error of the mean. PCI = Percutaneous Coronary Intervention, CAD = Coronary Artery Disease.
